# Supplementary material
Source: PubMed Central journal article supplement (PMC7338295)
Supplement: 12250_2020_253_MOESM1_ESM.pdf [file 12250_2020_253_MOESM1_ESM.pdf]

## Electronic Supplementary Material

### Long Term Culture of Human Kidney Proximal Tubule Epithelial Cells Maintains Lineage Functions and Serves as an *Ex vivo* Model for Coronavirus Associated Kidney Injury

Siyu Xia<sup>1</sup> • Ming Wu<sup>1</sup> • Si Chen<sup>1</sup> • Tao Zhang<sup>1</sup> • Lina Ye<sup>2</sup> • Jun Liu<sup>1</sup> • Hui Li<sup>1, 2</sup>✉

1. State Key Laboratory of Virology/Institute of Medical Virology, School of Basic Medical Sciences, Wuhan University, Wuhan 430071, China

2. Wuhan University Shenzhen Institute, Shenzhen 518057, China

Supporting information to DOI: 10.1007/s12250-020-00253-y

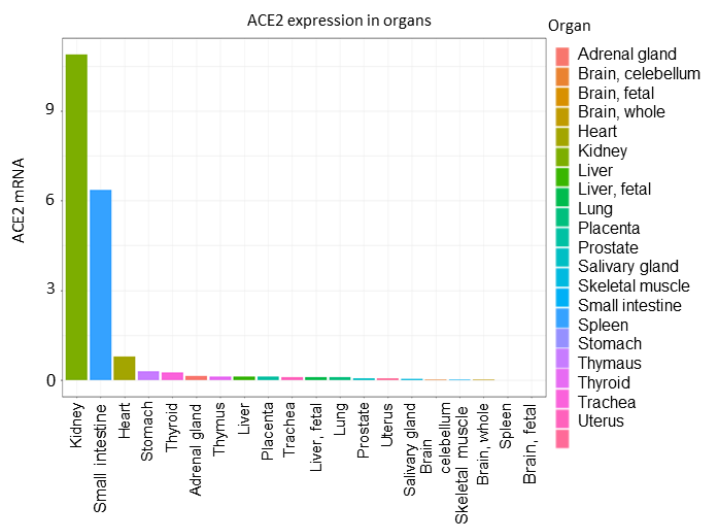

**Fig. S1** RNA-sequencing analysis of ACE2 expression level from public datasets. Bar plot of ACE2 expression level in different tissues from 20 human tissues reported in SRP056969 .

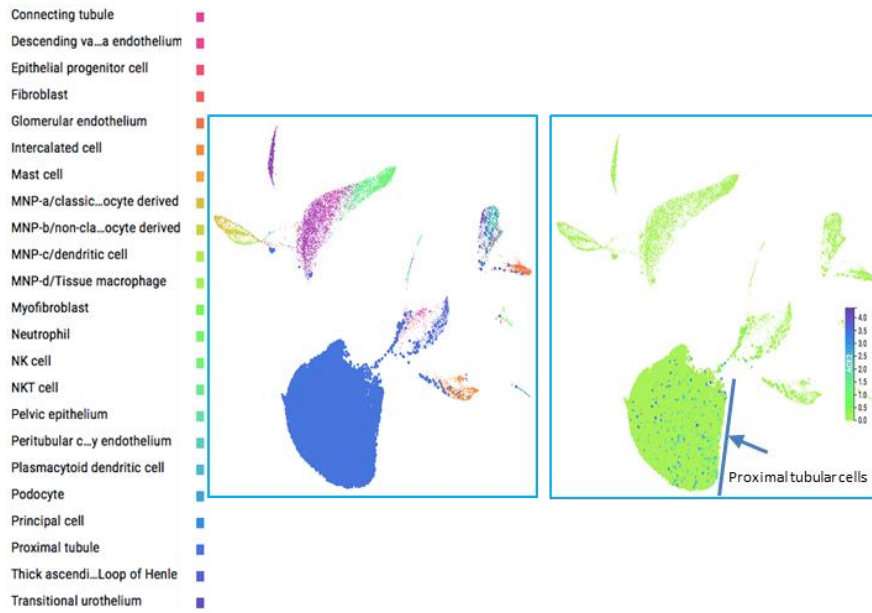

**Fig. S2** Single cell RNA-sequencing (scRNA-seq) analysis of ACE2 expression in kidney cells from public datasets. ACE2 expression is predominantly in proximal tubule epithelial cells. This data can be visualized and assessed through a special website portal ([www.covid19cellatlas.org](http://www.covid19cellatlas.org)).
